# Supplementary material for: Effect of Drainage Practice on the Emission of Two Carbon-Based Greenhouse Gases (CO<sub>2</sub> and CH<sub>4</sub>) from Paddy System in South Korea: Field Pilot Study
Source: Preprints.org preprint supplement (doi:10.20944/preprints202402.0507.v1), 2024-02-08
Supplement: Supplementary file 1 [file supplementary]

1 **Supplementary Materials**

2

3 **Effect of drainage practice on the emission of two carbon-based greenhouse gases (CO<sub>2</sub> and CH<sub>4</sub>)**  
4 **from paddy system in South Korea: field pilot study**

5

6

**List of Contents**

7

8 **Table S1.** Method and timing of farming practices in the experiment field under continuous flooding  
9 and intermittent drainage.

10

11 **Figure S1.** The components of the CO<sub>2</sub> and CH<sub>4</sub> flux measuring system (not to scale).

12

13 **Figure S2.** Changes in air temperature and precipitations during the rice growing season.

14

15 **Figure S3.** Pourbaix diagrams of Fe and S (25 °C) system (Davis and Ashenberg, 1989). The pH and  
16 Eh values measured in BG and MG pots containing magnetite are plotted in (a), and the pH  
17 and Eh values measured in JS pot containing ferrihydrite are plotted in (b) under the condition  
18 of intermittent drainage.

19 **Figure S4.** Changes of soil wetness (v/v, %) measured at the in the depth of 5 cm from the soil surface.  
20 For the treatment of intermittent drainage, soil wetness at the 15 cm depth was also  
21 determined.

22 **Table S1.** Method and timing of farming practices in the experiment field under continuous flooding  
 23 and intermittent drainage.

| Farming Practices \ Irrigation Methods | Continuous Flooding                                                                                                                                                                                                                              | Intermittent Drainage                                                                                                                                                                                                                                                                                |
|----------------------------------------|--------------------------------------------------------------------------------------------------------------------------------------------------------------------------------------------------------------------------------------------------|------------------------------------------------------------------------------------------------------------------------------------------------------------------------------------------------------------------------------------------------------------------------------------------------------|
| Fertilizer Application                 | 70 kg N ha <sup>-1</sup> at May 12 <sup>th</sup>                                                                                                                                                                                                 |                                                                                                                                                                                                                                                                                                      |
| Irrigation Period                      | May 12 <sup>th</sup> to August 10 <sup>th</sup>                                                                                                                                                                                                  |                                                                                                                                                                                                                                                                                                      |
| Rice Transplanting                     | Thirty-day old seedlings (3–4 plants per hill) of rice ( <i>Oryza sativa</i> L., Japonica) were transplanted with spacing of 25 cm × 25 cm by hand.                                                                                              |                                                                                                                                                                                                                                                                                                      |
| Cultivation Period                     | May 16 <sup>th</sup> (transplant) to Sep. 17 <sup>th</sup> (harvest)                                                                                                                                                                             |                                                                                                                                                                                                                                                                                                      |
| Flooding and Drainage                  | Paddy pot was flooded with 1–2 cm water until the rice plant attains the three-leaf stage (May 30 <sup>th</sup> ); and then, the pot was continuously flooded with 5–7 cm water depth; the pot was permanently drained 38 days prior to harvest. | Paddy pot was flooded with 1–2 cm water until the rice plant attains the three-leaf stage (May 30 <sup>th</sup> ); and then, the pot was flooded with 5–7 cm water depth and drained after 11 days. The practice was repeated three times. The pot was permanently drained 38 days prior to harvest. |

24

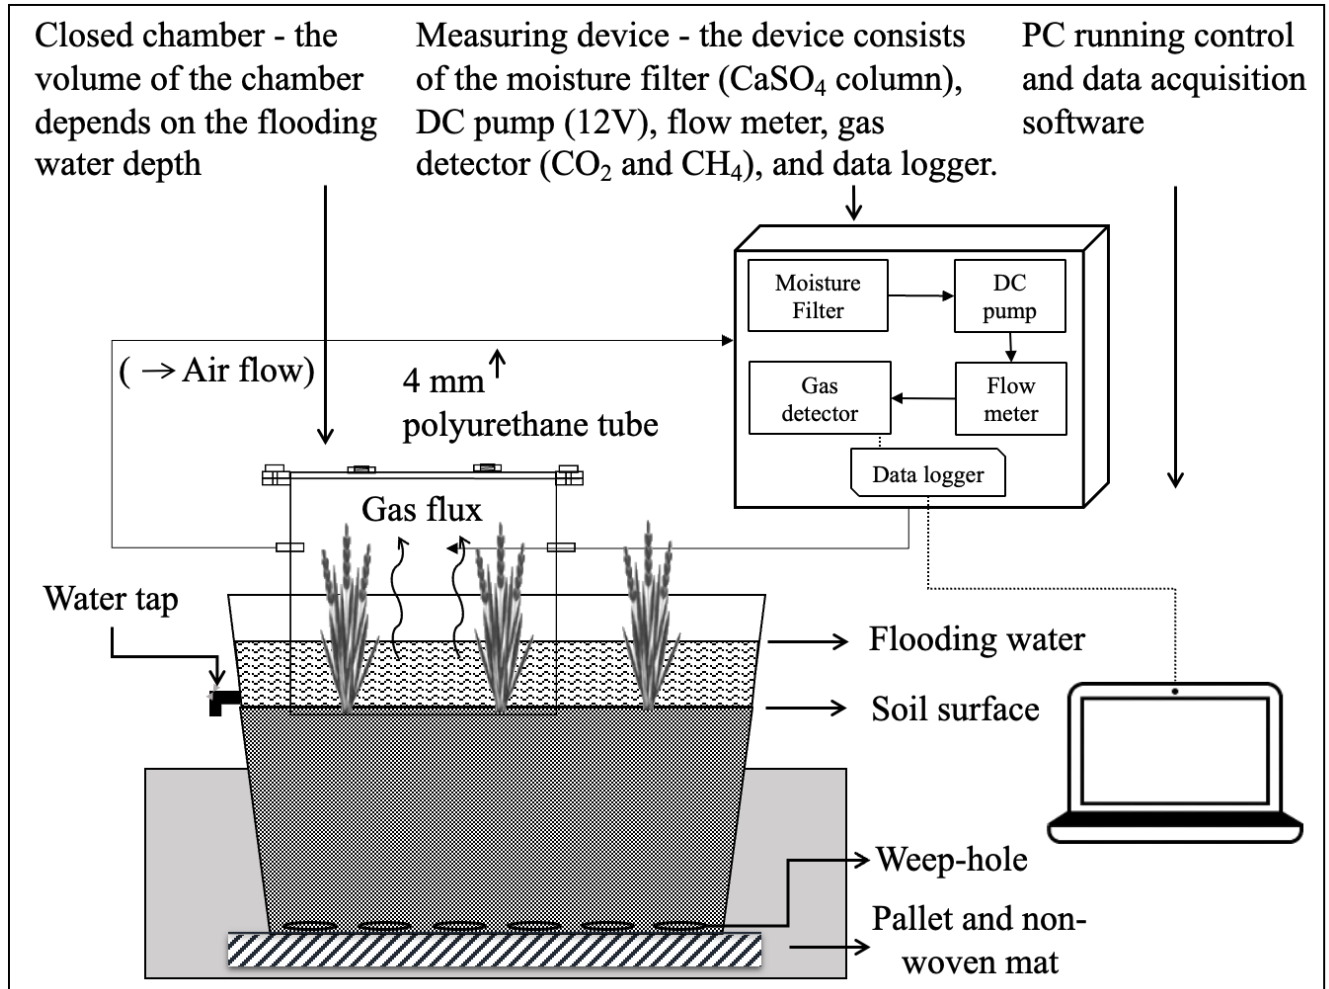

25

26 **Figure S1.**

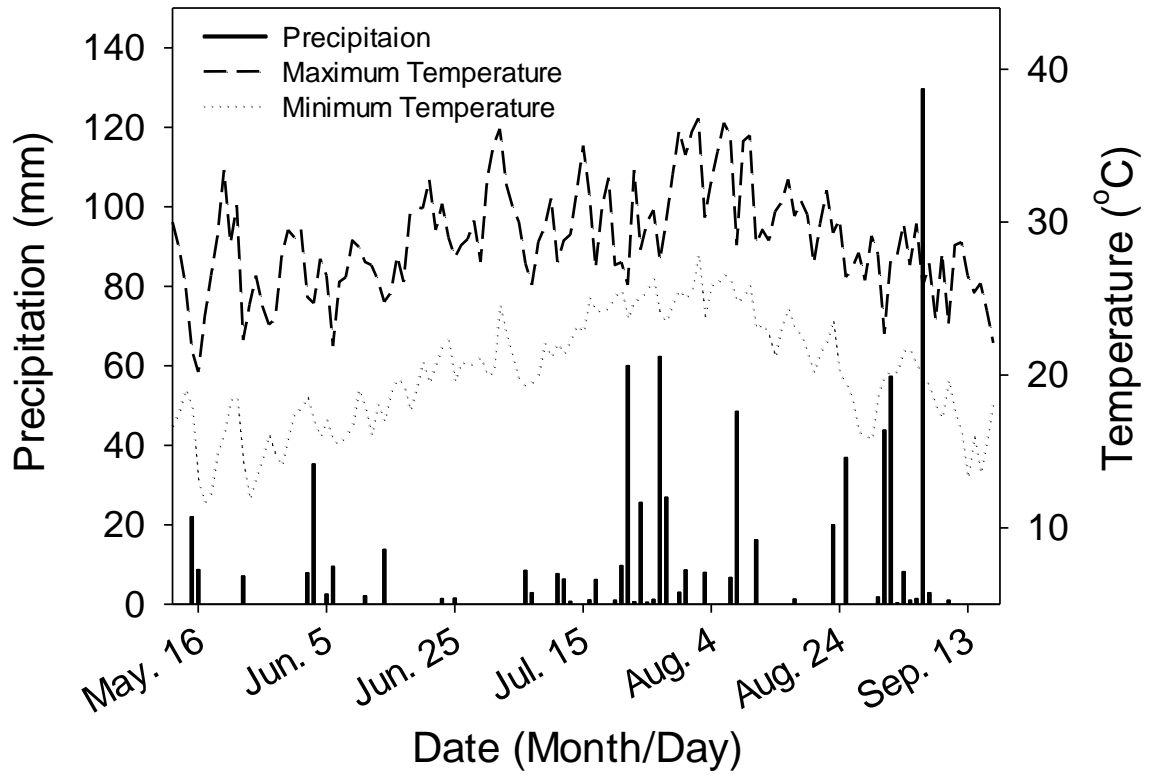

27

28 **Figure S2.**

# Eh-pH Diagram

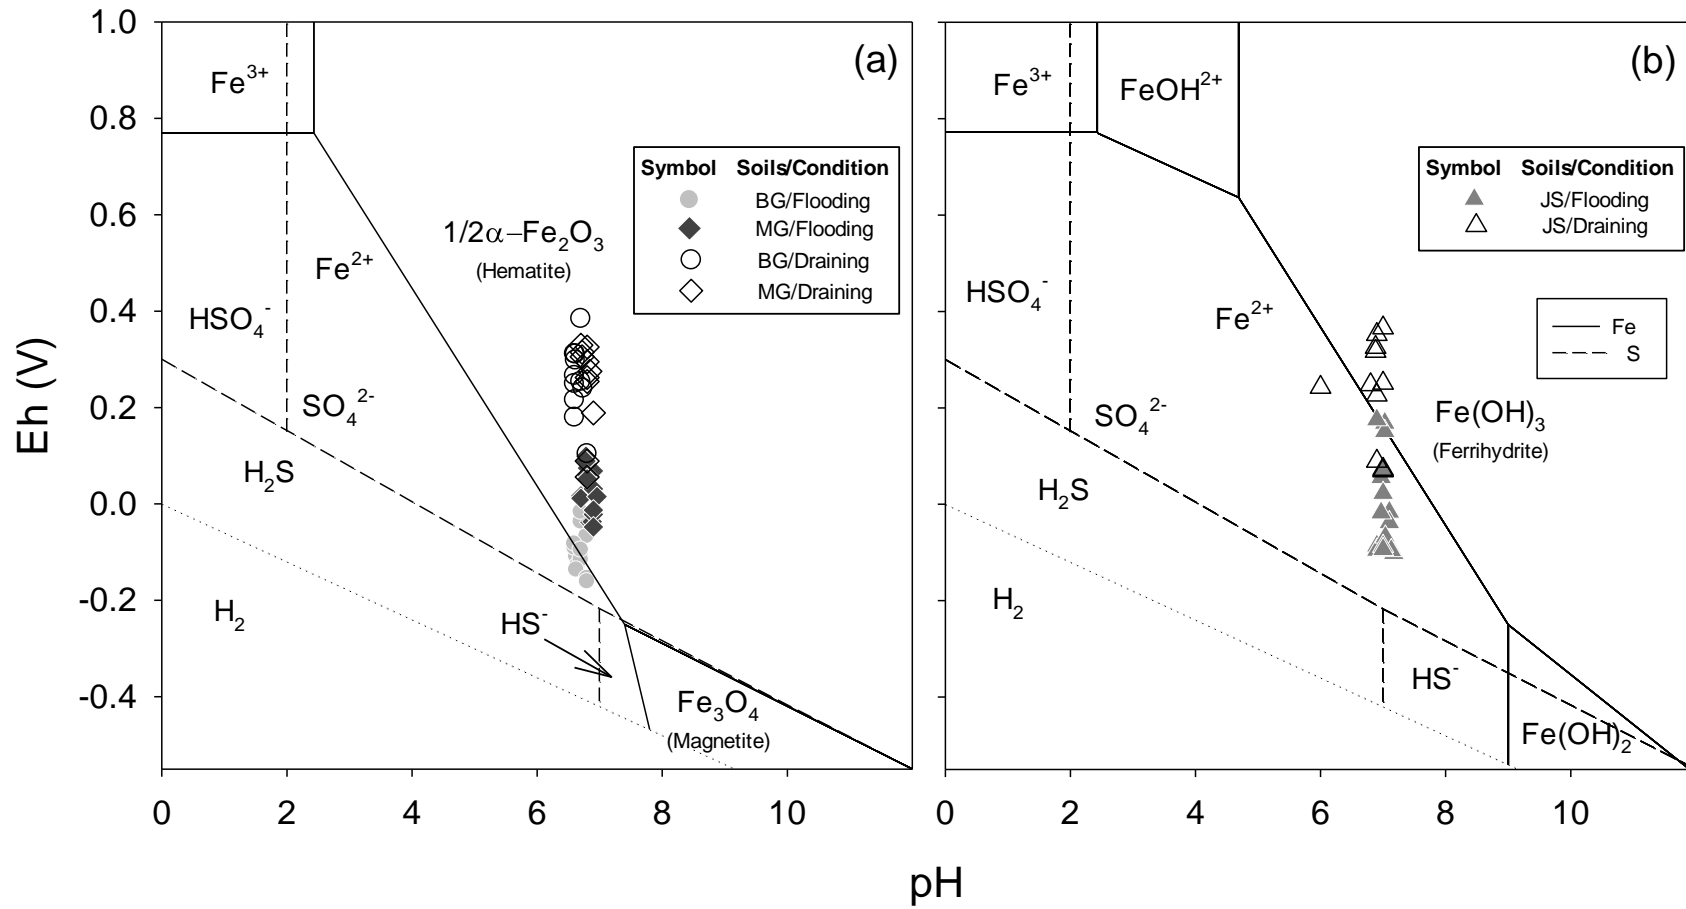

29

30 **Figure S3**

31

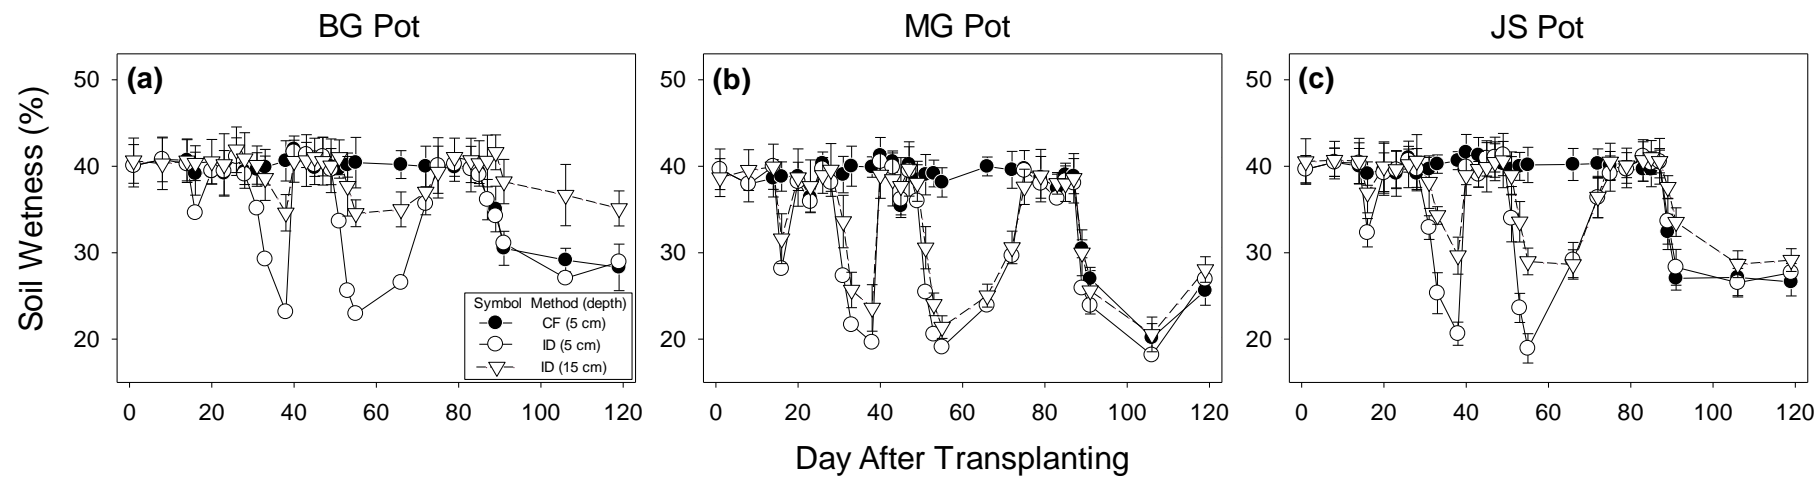

32

33 **Figure S4**
